# Supplementary material for: Bio-Priming of Soybean with Bradyrhizobium japonicum and Bacillus megaterium: Strategy to Improve Seed Germination and the Initial Seedling Growth
Source: MDPI journal article supplement (doi:10.3390/plants11151927), 2022-07-25
Supplement: s1 [file s1]

**Supplementary Table S1.** Analysis of variance for parameters of two soybean cultivars after applying *Bradyrhizobium japonicum* and *Bacillus megaterium* as a single inoculant and co-inoculant during seed bio-priming in different laboratory tests.

| Factor        | Traits                     |      |        |                   |      |        |                    |      |        |              |      |        |             |       |        |                  |      |        |                 |      |        |                      |       |        |
|---------------|----------------------------|------|--------|-------------------|------|--------|--------------------|------|--------|--------------|------|--------|-------------|-------|--------|------------------|------|--------|-----------------|------|--------|----------------------|-------|--------|
|               | Germination energy         |      |        | Final Germination |      |        | Abnormal seedlings |      |        | Shoot length |      |        | Root length |       |        | Shoot dry weight |      |        | Root dry weight |      |        | Seedling vigor index |       |        |
|               | Germination Test (a)       |      |        |                   |      |        |                    |      |        |              |      |        |             |       |        |                  |      |        |                 |      |        |                      |       |        |
|               | df                         | F    | p      | df                | F    | p      | df                 | F    | p      | df           | F    | p      | df          | F     | p      | df               | F    | p      | df              | F    | p      | df                   | F     | p      |
| Cultivar (C)  | 1                          | 0.2  | 0.7012 | 1                 | 0.5  | 0.4686 | 1                  | 3.3  | 0.0805 | 1            | 23.4 | 0.0001 | 1           | 188.5 | 0.0000 | 1                | 1.7  | 0.2075 | 1               | 36.3 | 0.0000 | 1                    | 44.9  | 0.0000 |
| Treatment (T) | 3                          | 9.3  | 0.0003 | 3                 | 7.8  | 0.0009 | 3                  | 11.1 | 0.0001 | 3            | 15.5 | 0.0000 | 3           | 15.2  | 0.0000 | 3                | 14.3 | 0.0000 | 3               | 17.4 | 0.0000 | 3                    | 32.8  | 0.0000 |
| C × T         | 3                          | 7.3  | 0.0012 | 3                 | 5.2  | 0.0069 | 3                  | 6.2  | 0.0029 | 3            | 8.9  | 0.0004 | 3           | 18.1  | 0.0000 | 3                | 3.1  | 0.0446 | 3               | 13.2 | 0.0000 | 3                    | 15.2  | 0.0000 |
|               | Cold Test (b)              |      |        |                   |      |        |                    |      |        |              |      |        |             |       |        |                  |      |        |                 |      |        |                      |       |        |
| Cultivar (C)  | -                          | -    | -      | 1                 | 1.1  | 0.3053 | 1                  | 0.6  | 0.4600 | 1            | 22.8 | 0.0001 | 1           | 234.3 | 0.0000 | 1                | 30.1 | 0.0000 | 1               | 5.9  | 0.0222 | 1                    | 26.1  | 0.0000 |
| Treatment (T) | -                          | -    | -      | 3                 | 10.1 | 0.0002 | 3                  | 22.1 | 0.0000 | 3            | 95.3 | 0.0000 | 3           | 313.2 | 0.0000 | 3                | 14.2 | 0.0000 | 3               | 16.7 | 0.0000 | 3                    | 221.1 | 0.0000 |
| C × T         | -                          | -    | -      | 3                 | 1.8  | 0.1689 | 3                  | 31.6 | 0.0000 | 3            | 7.9  | 0.0008 | 3           | 5.1   | 0.0075 | 3                | 14.2 | 0.0000 | 3               | 2.1  | 0.1325 | 3                    | 9.6   | 0.0002 |
|               | Accelerated Aging Test (c) |      |        |                   |      |        |                    |      |        |              |      |        |             |       |        |                  |      |        |                 |      |        |                      |       |        |
| Cultivar (C)  | 1                          | 0.2  | 0.6443 | 1                 | 8.4  | 0.0079 | 1                  | 45.3 | 0.0000 | 1            | 73.3 | 0.0000 | 1           | 1.5   | 0.2294 | 1                | 3.2  | 0.0871 | 1               | 5.8  | 0.0238 | 1                    | 49.9  | 0.0000 |
| Treatment (T) | 3                          | 20.4 | 0.0000 | 3                 | 13.9 | 0.0000 | 3                  | 41.1 | 0.0000 | 3            | 51.7 | 0.0000 | 3           | 84.5  | 0.0000 | 3                | 4.7  | 0.0106 | 3               | 3.5  | 0.0313 | 3                    | 111.4 | 0.0000 |
| C × T         | 3                          | 23.7 | 0.0000 | 3                 | 12.5 | 0.0000 | 3                  | 36.0 | 0.0000 | 3            | 46.2 | 0.0000 | 3           | 130.0 | 0.0000 | 3                | 1.6  | 0.2221 | 3               | 12.8 | 0.0000 | 3                    | 136.9 | 0.0000 |

**Supplementary Table S2.** Effect of seed bio-priming treatments on soybean parameters in germination test.

| Treatment                 | Cultivar           |                     |
|---------------------------|--------------------|---------------------|
|                           | Atlas              | Teona               |
| Germination Energy (%)    |                    |                     |
| Control                   | 74.75 ± 0.25 bB    | 78.00 ± 0.71 aA     |
| <i>B. japonicum</i> (BJ)  | 80.25 ± 1.03 aA    | 79.25 ± 0.95 aA     |
| <i>B. megaterium</i> (BM) | 80.50 ± 0.29 aA    | 77.75 ± 0.48 aAB    |
| BJ + BM                   | 78.00 ± 0.82 aA    | 79.25 ± 0.48 aA     |
| Average                   | 78.38 A            | 78.56 A             |
| Final Germination (%)     |                    |                     |
| Control                   | 85.25 ± 1.31 bB    | 89.25 ± 0.95 abA    |
| <i>B. japonicum</i> (BJ)  | 89.25 ± 0.63 abA   | 88.00 ± 0.41 bAB    |
| <i>B. megaterium</i> (BM) | 91.75 ± 0.63 aA    | 89.75 ± 0.25 abA    |
| BJ + BM                   | 90.00 ± 1.22 aA    | 91.00 ± 0.71 aA     |
| Average                   | 89.06 A            | 89.50 A             |
| Abnormal Seedlings (%)    |                    |                     |
| Control                   | 9.75 ± 0.63 aA     | 8.00 ± 0.71 aAB     |
| <i>B. japonicum</i> (BJ)  | 8.00 ± 0.41 abAB   | 8.50 ± 0.29 aAB     |
| <i>B. megaterium</i> (BM) | 6.25 ± 0.63 bcBC   | 7.50 ± 0.65 aAB     |
| BJ + BM                   | 4.75 ± cC          | 7.50 ± 0.29 aAB     |
| Average                   | 7.19 A             | 7.88 A              |
| Shoot Length (mm)         |                    |                     |
| Control                   | 118.83 ± 0.83 cD   | 118.00 ± 1.67 bD    |
| <i>B. japonicum</i> (BJ)  | 132.18 ± 1.39 abA  | 124.18 ± 1.05 abBCD |
| <i>B. megaterium</i> (BM) | 127.18 ± 1.53 bABC | 127.83 ± 2.74 aAB   |
| BJ + BM                   | 134.33 ± 1.16 aA   | 119.83 ± 2.05 abCD  |
| Average                   | 128.13 A           | 122.46 B            |
| Root Length (mm)          |                    |                     |
| Control                   | 132.88 ± 2.02 bC   | 156.38 ± 0.43 bB    |
| <i>B. japonicum</i> (BJ)  | 137.88 ± 3.18 bC   | 156.25 ± 2.57 bB    |
| <i>B. megaterium</i> (BM) | 138.50 ± 2.05 bC   | 176.50 ± 0.35 aA    |
| BJ + BM                   | 151.63 ± 2.55 aB   | 157.50 ± 2.68 bB    |
| Average                   | 140.22 B           | 161.66 A            |
| Shoot Dry Weight (g)      |                    |                     |
| Control                   | 0.765 ± 0.035 cB   | 0.884 ± 0.047 abAB  |
| <i>B. japonicum</i> (BJ)  | 0.957 ± 0.026 aA   | 0.968 ± 0.052aA     |
| <i>B. megaterium</i> (BM) | 0.957 ± 0.009 aA   | 1.004 ± 0.015 aA    |
| BJ + BM                   | 0.869 ± 0.017 bAB  | 0.804 ± 0.017 bB    |
| Average                   | 0.887 A            | 0.915 A             |
| Root Dry Weight (g)       |                    |                     |
| Control                   | 0.114 ± 0.012 cC   | 0.128 ± 0.016 bBC   |
| <i>B. japonicum</i> (BJ)  | 0.186 ± 0.005 aB   | 0.169 ± 0.007 bBC   |
| <i>B. megaterium</i> (BM) | 0.140 ± 0.010 bcBC | 0.246 ± 0.010 aA    |
| BJ + BM                   | 0.150 ± 0.003 bBC  | 0.262 ± 0.024 aA    |
| Average                   | 0.147 B            | 0.201 A             |
| Seedling Vigor Index      |                    |                     |

|                           |                      |                     |
|---------------------------|----------------------|---------------------|
| Control                   | 2145.13 ± 24.45 cD   | 2449.01 ± 35.52 bBC |
| <i>B. japonicum</i> (BJ)  | 2410.82 ± 53.79 bC   | 2467.43 ± 22.84 bBC |
| <i>B. megaterium</i> (BM) | 2437.70 ± 27.28 abBC | 2731.32 ± 24.08 aA  |
| BJ + BM                   | 2572.80 ± 20.99 aB   | 2523.26 ± 33.15 bBC |
| Average                   | 2391.61 B            | 2542.76 A           |

Data are represented as mean ± standard error of the mean (n=4); Differences between treatments were analysed using the Tukey's HSD test ( $p \leq 0.05$ ). Means within each trait followed by the same lowercase/uppercase letters are not significantly different.

**Supplementary Table S3.** Effect of seed bio-priming treatments on soybean parameters in cold test.

| Treatment                 | Cultivar             |                      |
|---------------------------|----------------------|----------------------|
|                           | Atlas                | Teona                |
| Final Germination (%)     |                      |                      |
| Control                   | 76.00 ± 2.16 bC      | 78.00 ± 1.41 bBC     |
| <i>B. japonicum</i> (BJ)  | 81.25 ± 0.48 aABC    | 84.75 ± 0.48 abA     |
| <i>B. megaterium</i> (BM) | 80.75 ± 0.48 abABC   | 80.00 ± 0.82 abABC   |
| BJ + BM                   | 82.75 ± 0.95 aAB     | 81.50 ± 1.50 abABC   |
| Average                   | 80.19 A              | 81.06 A              |
| Abnormal Seedlings (%)    |                      |                      |
| Control                   | 18.75 ± 0.48 aA      | 14.75 ± 0.48 abBC    |
| <i>B. japonicum</i> (BJ)  | 13.25 ± 0.48 cCD     | 10.75 ± 0.48 cD      |
| <i>B. megaterium</i> (BM) | 15.25 ± 0.25 bBC     | 14.00 ± 0.82 bC      |
| BJ + BM                   | 10.75 ± 0.48 dD      | 17.25 ± 0.95 aAB     |
| Average                   | 14.50 A              | 14.19 A              |
| Shoot Length (mm)         |                      |                      |
| Control                   | 62.13 ± 1.01 cD      | 57.13 ± 1.23 bD      |
| <i>B. japonicum</i> (BJ)  | 77.25 ± 0.95 bBC     | 79.50 ± 1.74 aABC    |
| <i>B. megaterium</i> (BM) | 84.50 ± 1.08 aA      | 72.88 ± 2.59 aC      |
| BJ + BM                   | 83.00 ± 0.94 aAB     | 78.13 ± 1.01 aABC    |
| Average                   | 76.72 A              | 71.91 B              |
| Root Length (mm)          |                      |                      |
| Control                   | 67.13 ± 0.43 cE      | 78.13 ± 1.65 bD      |
| <i>B. japonicum</i> (BJ)  | 92.88 ± 1.48 bC      | 110.13 ± 0.31 aA     |
| <i>B. megaterium</i> (BM) | 96.50 ± 1.97 abBC    | 112.25 ± 1.25 aA     |
| BJ + BM                   | 99.13 ± 0.31 aB      | 108.13 ± 1.13 aA     |
| Average                   | 88.91 B              | 102.16 A             |
| Shoot Dry Weight (g)      |                      |                      |
| Control                   | 1.053 ± 0.035 aCD    | 1.061 ± 0.008 cD     |
| <i>B. japonicum</i> (BJ)  | 1.135 ± 0.017 aBC    | 1.110 ± 0.016 bCD    |
| <i>B. megaterium</i> (BM) | 1.091 ± 0.004 aCD    | 1.192 ± 0.013 aAB    |
| BJ + BM                   | 1.070 ± 0.010 aCD    | 1.239 ± 0.006 aA     |
| Average                   | 1.088 B              | 1.151 A              |
| Root Dry Weight (g)       |                      |                      |
| Control                   | 0.049 ± 0.004 bC     | 0.061 ± 0.003 bBC    |
| <i>B. japonicum</i> (BJ)  | 0.077 ± 0.008 aAB    | 0.078 ± 0.001 aAB    |
| <i>B. megaterium</i> (BM) | 0.082 ± 0.002 aA     | 0.081 ± 0.003 aA     |
| BJ + BM                   | 0.066 ± 0.003 abABC  | 0.081 ± 0.002 aA     |
| Average                   | 0.068 B              | 0.075 A              |
| Seedling Vigor Index      |                      |                      |
| Control                   | 982.67 ± 32.52 cD    | 1054.30 ± 11.58 cD   |
| <i>B. japonicum</i> (BJ)  | 1382.42 ± 17.65 bC   | 1606.81 ± 10.27 aA   |
| <i>B. megaterium</i> (BM) | 1461.62 ± 25.59 abBC | 1480.35 ± 6.25 bBC   |
| BJ + BM                   | 1506.80 ± 10.91 aAB  | 1518.60 ± 40.84 abAB |
| Average                   | 1333.38 B            | 1415.02 A            |

Data are represented as mean  $\pm$  standard error of the mean (n=4); Differences between treatments were analysed using the Tukey's HSD test ( $p \leq 0.05$ ). Means within each trait followed by the same lowercase/uppercase letters are not significantly different.

**Supplementary Table S4.** Effect of seed bio-priming treatments on soybean parameters in accelerated aging test.

| Treatment                 | Cultivar           |                    |
|---------------------------|--------------------|--------------------|
|                           | Atlas              | Teona              |
| Germination Energy (%)    |                    |                    |
| Control                   | 71.00 ± 0.71 cBC   | 75.00 ± 1.87 aB    |
| <i>B. japonicum</i> (BJ)  | 67.25 ± 0.95 dC    | 71.25 ± 0.95 aBC   |
| <i>B. megaterium</i> (BM) | 74.75 ± 0.25 bB    | 75.25 ± 0.85 aB    |
| BJ + BM                   | 81.00 ± 0.41 aA    | 71.25 ± 0.63 aBC   |
| Average                   | 73.50 A            | 73.19 A            |
| Final Germination (%)     |                    |                    |
| Control                   | 78.25 ± 1.18 bBC   | 81.00 ± 0.41 aAB   |
| <i>B. japonicum</i> (BJ)  | 78.25 ± 1.25 bBC   | 75.75 ± 0.48 bC    |
| <i>B. megaterium</i> (BM) | 82.75 ± 1.25 abA   | 83.00 ± 1.08 aA    |
| BJ + BM                   | 85.25 ± 0.95 aA    | 77.00 ± 0.41 bBC   |
| Average                   | 81.13 A            | 79.19 B            |
| Abnormal Seedlings (%)    |                    |                    |
| Control                   | 13.00 ± 0.82 bCD   | 10.25 ± 0.25 dE    |
| <i>B. japonicum</i> (BJ)  | 16.25 ± 0.48 aB    | 17.00 ± 0.82 bAB   |
| <i>B. megaterium</i> (BM) | 10.25 ± 0.48 cE    | 14.75 ± 0.48 cBC   |
| BJ + BM                   | 11.75 ± 0.25 bcDE  | 19.25 ± 0.25 aA    |
| Average                   | 12.81 B            | 15.31 A            |
| Shoot Length (mm)         |                    |                    |
| Control                   | 110.13 ± 2.18 cE   | 126.00 ± 1.62 abCD |
| <i>B. japonicum</i> (BJ)  | 136.13 ± 1.50 bB   | 118.75 ± 2.05 bDE  |
| <i>B. megaterium</i> (BM) | 147.10 ± 2.58 aA   | 121.13 ± 2.87 bD   |
| BJ + BM                   | 151.50 ± 0.20 aA   | 131.50 ± 1.41 aBC  |
| Average                   | 136.21 A           | 124.34 B           |
| Root Length (mm)          |                    |                    |
| Control                   | 72.75 ± 2.14 cE    | 134.00 ± 1.67 aBCD |
| <i>B. japonicum</i> (BJ)  | 141.13 ± 2.47 bB   | 120.25 ± 3.24 bD   |
| <i>B. megaterium</i> (BM) | 174.00 ± 2.16 aA   | 123.25 ± 5.10 abCD |
| BJ + BM                   | 136.13 ± 3.65 bBC  | 136.25 ± 1.01 aBC  |
| Average                   | 131.00 A           | 128.44 A           |
| Shoot Dry Weight (g)      |                    |                    |
| Control                   | 0.951 ± 0.047 aA   | 0.967 ± 0.023 aA   |
| <i>B. japonicum</i> (BJ)  | 0.878 ± 0.012 aA   | 0.956 ± 0.002 aA   |
| <i>B. megaterium</i> (BM) | 0.891 ± 0.012 aA   | 0.914 ± 0.008 aA   |
| BJ + BM                   | 0.974 ± 0.005 aA   | 0.963 ± 0.019 aA   |
| Average                   | 0.924 A            | 0.950 A            |
| Root Dry Weight (g)       |                    |                    |
| Control                   | 0.133 ± 0.006 cC   | 0.180 ± 0.017 aAB  |
| <i>B. japonicum</i> (BJ)  | 0.192 ± 0.003 abAB | 0.161 ± 0.004 aBC  |
| <i>B. megaterium</i> (BM) | 0.214 ± 0.005 aA   | 0.153 ± 0.008 aBC  |
| BJ + BM                   | 0.175 ± 0.008 bAB  | 0.158 ± 0.012 aBC  |

| Average                   | 0.179 A            | 0.163 B            |
|---------------------------|--------------------|--------------------|
| Seedling Vigor Index      |                    |                    |
| Control                   | 1430.56 ± 34.14 dE | 2106.21 ± 25.09 aC |
| <i>B. japonicum</i> (BJ)  | 2169.18 ± 28.69 cC | 1810.30 ± 8.49 bD  |
| <i>B. megaterium</i> (BM) | 2655.63 ± 14.24 aA | 2028.98 ± 73.62 aC |
| BJ + BM                   | 2451.49 ± 30.57 bB | 2061.81 ± 23.72 aC |
| Average                   | 2176.72 A          | 2001.83 B          |

Data are represented as mean ± standard error of the mean (n=4); Differences between treatments were analysed using the Tukey's HSD test ( $p \leq 0.05$ ). Means within each trait followed by the same lowercase/uppercase letters are not significantly different.
